# Supplementary material for: Design and characterization of a polyamine derivative inhibiting the expression of type III secretion system in Pseudomonas aeruginosa
Source: PubMed Central journal article supplement (PMC4971474; doi:10.1038/srep30949), 2016-08-03
Supplement: srep30949-s1.pdf [file srep30949-s1.pdf]

## SUPPLEMENTARY INFORMATION

For

The manuscript of “**Design and characterization of a polyamine derivative inhibiting the expression of type III secretion system in *Pseudomonas aeruginosa***” by Chao Wang, Xiaoling Liu, Jing Wang, Zining Cui, Lian-Hui Zhang.

### Summary

This Supplementary Data document contains three supplementary figures and three supplementary tables. Fig.S1 describes the synthesis of polyamine derivatives; Fig.S2 presents the protective effect of R101SPM on mice infected by *P. aeruginosa*, and Fig.S3 for the effect of R101SPM on other virulence factors of *P. aeruginosa*. Table S1 describes the ORFs whose transcriptions are upregulated by 5A treatment in the microarray analysis. Table S2 lists the ORFs whose transcriptions are decreased in response to 5A revealed in the microarray analysis. Table S3 lists the bacterial strains used in this study. The Supplementary method described the chemistry of synthesis and characterization of new compounds in this paper. The entire supplementary information is integrated into a PDF file.

Fig. S1

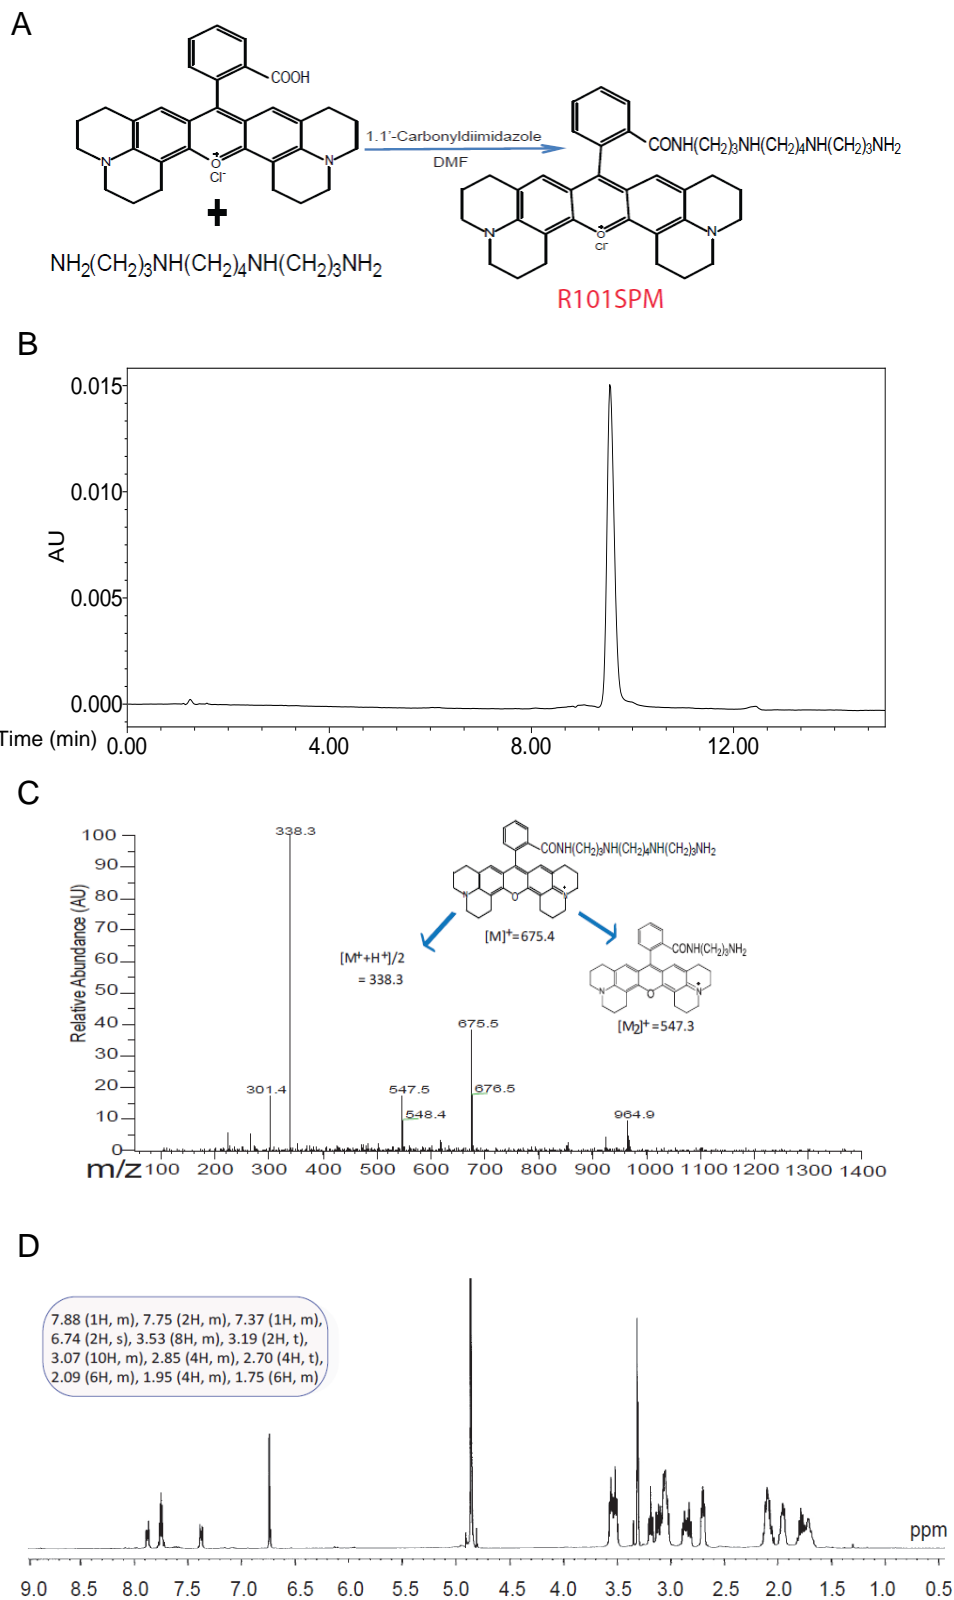

**Fig. S1. Chemical synthesis of the spermidine derivative R101SPM.**

(A) Schematic routine for chemical synthesis of R101SPM.

(B) HPLC profiles for the purified R101SPM. 100  $\mu\text{mol}$  of purified product was concentrated and resolved in 1M HCl aqueous solution, and then subjected to HPLC on the analytic C18 reverse-phase column (4.6 x 250mm, Waters), eluted with acetonitrile–water with a gradient of 20%-40% at a flow of 4 ml  $\text{min}^{-1}$ .

(C) Mass spectra of the synthesized R101SPM. The sample collected from HPLC separation was evaporated, dissolved in methanol–water (50:50 v/v), and then introduced into the mass spectrometer by loop injection. ESI-MS and tandem mass spectrometry were performed on a Finnigan LCQ DECA ion trap mass spectrometer.

(D)  $^1\text{H}$  NMR spectra of the synthesized R101SPM.  $^1\text{H}$  NMR spectra were recorded on a Bruker AMX400 (400 MHz) spectrometer using methanol- $d_4$  solvent with tetramethylsilane as an internal standard at room temperature.

Fig.S2

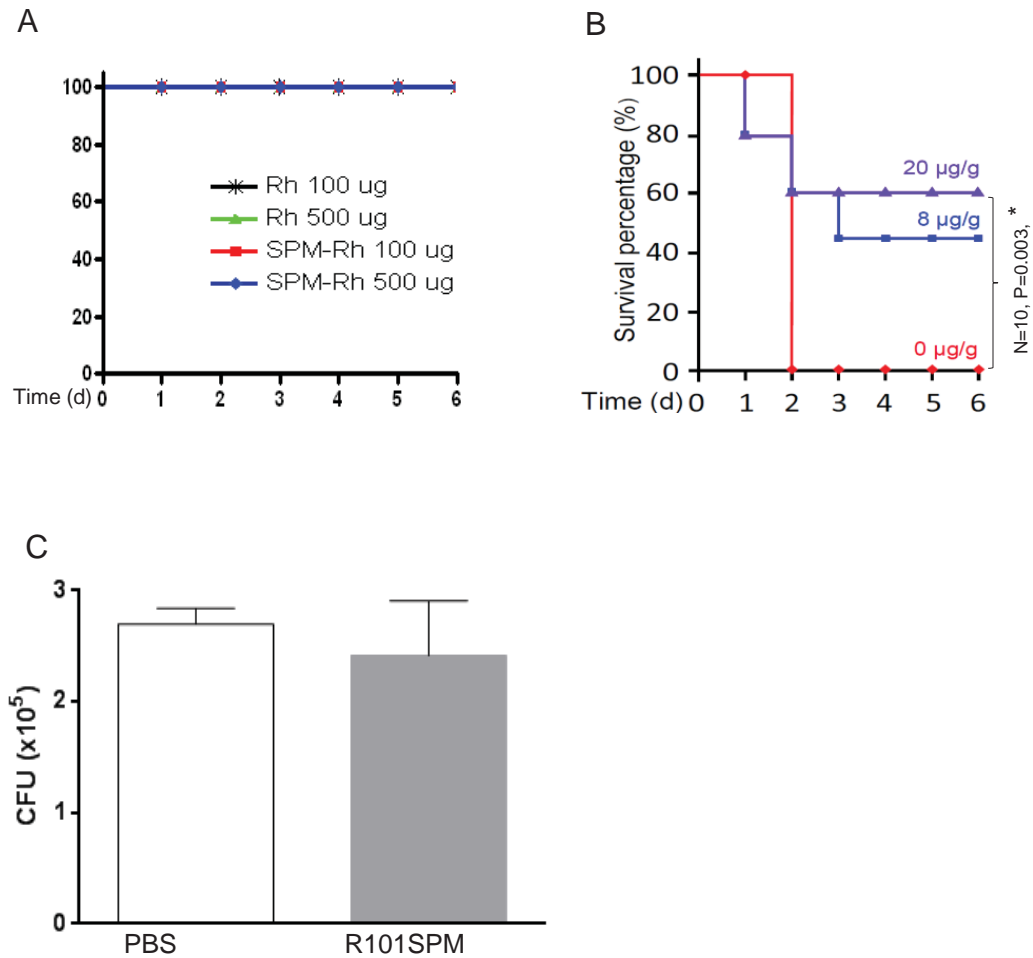

**Fig. S2. Protective effect of R101SPM on mice infected by *P. aeruginosa*.**

(A) The TTSS defective mutant *P. aeruginosa* PAO1( $\Delta\text{exsA}$ ) was avirulent under the described conditions. Bacterial cells were prepared and mice injection were conducted as described for Fig. 5C. Five FVB/N male mice were included for each group.

(B) Protection of R101SPM for mice infected with *P. aeruginosa* by intraperitoneal injection. PAO1 cells were intraperitoneally infected at one side of belly, while R101SPM was intraperitoneally injected at the other side of belly.

(C) Viability assay of *P. aeruginosa* treated with 1mM R101SPM for half an hour.

**Fig. S3**

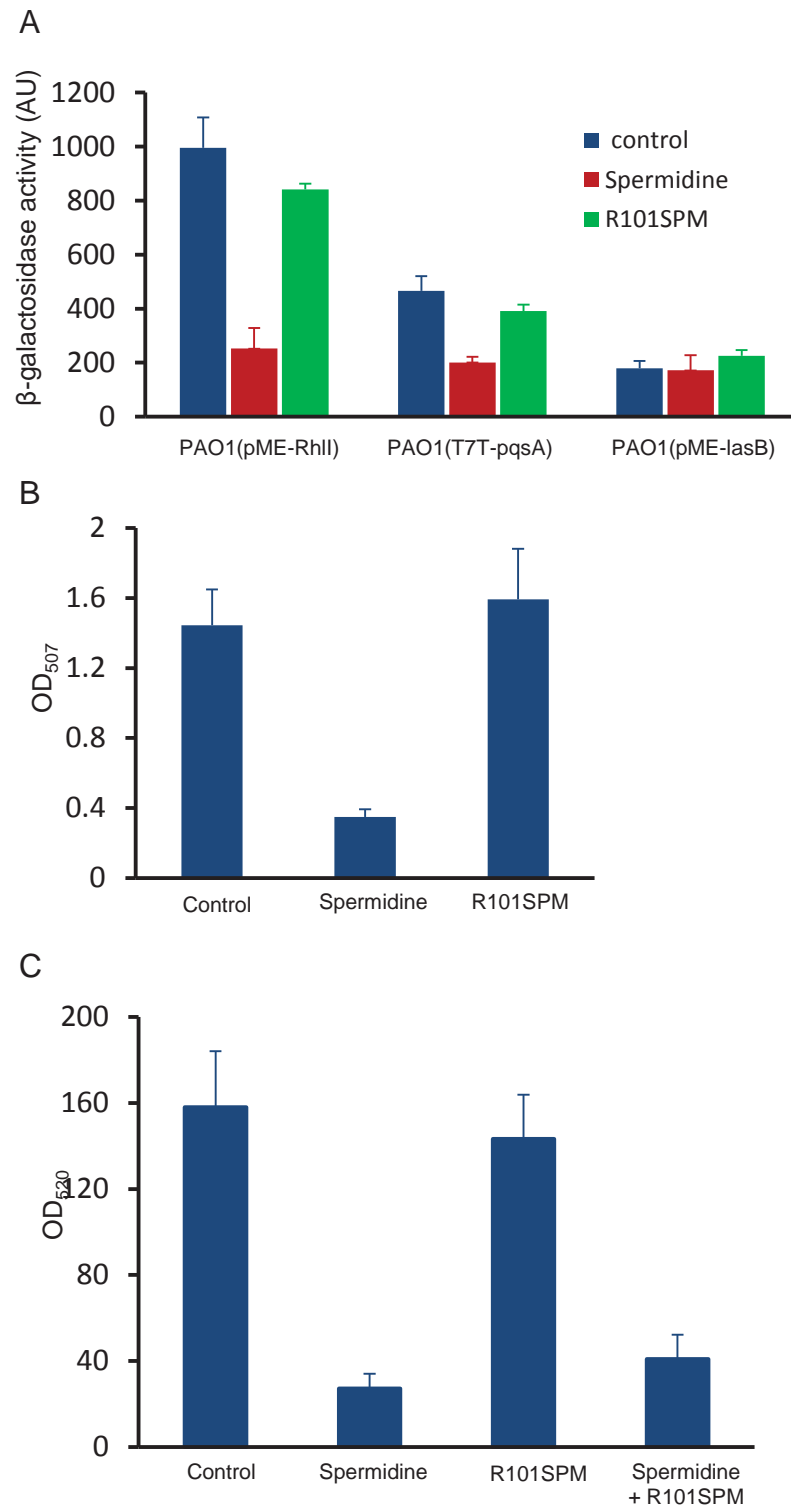

**Fig. S3 Effect of R101SPM on other virulence factors of *P. aeruginosa*.**

(A) Effect of R101SPM on quorum sensing system. Fresh specified bacterial strains were grown in LB medium (blue column) or supplied with 0.7mM spermidine (red column) or with 20  $\mu$ M R101SPM (green column). At early stationary phase, the  $\beta$ -galactosidase activity was measured as described.

(B) Effects of R101SPM (20  $\mu$ M) and spermidine (0.7 mM) biofilm formation. Overnight PAO1 cultures were diluted to OD<sub>600</sub> of 0.03 in LB containing specified compounds, and duplicate 1ml aliquots were dispensed into 15ml falcon tubes. Following static incubation in a 30 °C chamber, the medium was removed, stained with 0.5% violent crystal dye and then washed gently with distilled water. For quantification, the blue dye was dissolved in 1ml ethanol for the OD<sub>507</sub> reading.

(C) Effects of R101SPM (20  $\mu$ M) and spermidine (0.7 mM) on pyocyanin production. Fresh PAO1 cells were inoculated with initial OD<sub>600</sub> of 0.03 in the PA medium containing the specified compounds. After overnight growth at 37°C, pyocyanin was measured as described. Spd: spermidine; R101M: R101SPM; plus: presence of given compound(s), minus: absence of compounds.

**Table S1.** Upregulated genes with 5A treatment ( $\geq 2.0$ ).

| ORF <sup>b</sup>                  | Gene  | fold <sup>a</sup> | Description                                                       |
|-----------------------------------|-------|-------------------|-------------------------------------------------------------------|
| <b>Genes with known functions</b> |       |                   |                                                                   |
| PA0120                            |       | 2.48              | probable transcriptional regulator                                |
| PA0204                            |       | 2.73              | probable permease of ABC transporter                              |
| PA0212                            | mdcE  | 3.04              | malonate decarboxylase gamma subunit                              |
| PA0229                            | pcaT  | 3.42              | dicarboxylic acid transporter PcaT                                |
| PA0253                            | hudR  | 2.36              | HudR                                                              |
| PA0268                            |       | 2.32              | probable transcriptional regulator                                |
| PA0293                            | aguB  | 2.52              | N-carbamoylputrescine amidohydrolase                              |
| PA0382                            | micA  | 2.32              | DNA mismatch repair protein MicA                                  |
| PA0440                            | dypA  | 2.78              | probable oxidoreductase                                           |
| PA0478                            |       | 2.67              | probable N-acetyltransferase                                      |
| PA0493                            |       | 2.36              | probable biotin-requiring enzyme                                  |
| PA0517                            | nirC  | 3.36              | probable c-type cytochrome precursor                              |
| PA0519                            | nirS  | 2.82              | nitrite reductase precursor                                       |
| PA0530                            |       | 2.73              | probable class III pyridoxal phosphate-dependent aminotransferase |
| PA0531                            |       | 2.91              | probable glutamine amidotransferase                               |
| PA0604                            | agtB  | 3.54              | AgtB                                                              |
| PA0605                            | agtC  | 2.92              | AgtC                                                              |
| PA0606                            | agtD  | 2.66              | AgtD                                                              |
| PA0993                            | cupC2 | 3.54              | chaperone CupC2                                                   |
| PA0996                            | pqsA  | 2.21              | probable coenzyme A ligase                                        |
| PA0997                            | pqsB  | 3.90              | PqsB                                                              |
| PA0998                            | pqsC  | 3.29              | PqsC                                                              |
| PA0999                            | pqsD  | 3.77              | 3-oxoacyl-[acyl-carrier-protein] synthase III                     |
| PA1000                            | pqsE  | 3.52              | Quinolone signal response protein                                 |
| PA1001                            | phnA  | 3.52              | anthranilate synthase component I                                 |
| PA1002                            | phnB  | 2.99              | anthranilate synthase component II                                |
| PA1109                            |       | 3.02              | probable transcriptional regulator                                |
| PA1144                            |       | 2.29              | probable major facilitator superfamily (MFS) transporter          |
| PA1169                            |       | 2.68              | probable lipoxygenase                                             |
| PA1196                            |       | 4.35              | probable transcriptional regulator                                |
| PA1217                            |       | 3.05              | probable 2-isopropylmalate synthase                               |
| PA1275                            | cobD  | 2.92              | cobalamin biosynthetic protein CobD                               |
| PA1303                            |       | 2.31              | signal peptidase                                                  |
| PA1347                            |       | 3.71              | probable transcriptional regulator                                |
| PA1389                            |       | 2.23              | probable glycosyl transferase                                     |
| PA1556                            | ccoO2 | 2.46              | Cytochrome c oxidase, cbb3-type, CcoO subunit                     |
| PA1596                            | htpG  | 2.62              | heat shock protein HtpG                                           |
| PA1617                            |       | 2.68              | probable AMP-binding enzyme                                       |
| PA1637                            | kdpE  | 2.19              | two-component response regulator KdpE                             |

|        |       |      |                                                                                                                 |
|--------|-------|------|-----------------------------------------------------------------------------------------------------------------|
| PA1660 | hsiG2 | 2.40 | HsiG2                                                                                                           |
| PA1667 | hsiJ2 | 2.65 | HsiJ2                                                                                                           |
| PA1779 | nasA  | 2.78 | assimilatory nitrate reductase                                                                                  |
| PA1845 | tsi1  | 2.56 | Tsi1                                                                                                            |
| PA1867 | xphA  | 2.23 | XphA                                                                                                            |
| PA1875 |       | 2.19 | probable outer membrane protein precursor                                                                       |
| PA1956 | fapA  | 2.35 | FapA                                                                                                            |
| PA1962 | azoR2 | 2.65 | FMN-dependent NADH-azoreductase 2, AzoR2                                                                        |
| PA2077 |       | 2.97 | oleate 10S-lipoxygenase                                                                                         |
| PA2119 | adh   | 2.13 | alcohol dehydrogenase (Zn-dependent)                                                                            |
| PA2124 |       | 2.54 | probable dehydrogenase                                                                                          |
| PA2298 |       | 2.13 | probable transcriptional regulator                                                                              |
| PA2381 |       | 2.34 | L-lactate dehydrogenase                                                                                         |
| PA2414 |       | 2.99 | L-sorbose dehydrogenase                                                                                         |
| PA2449 |       | 2.78 | transcriptional regulator                                                                                       |
| PA2499 | ykoA  | 2.74 | probable deaminase                                                                                              |
| PA2922 |       | 2.58 | probable hydrolase                                                                                              |
| PA2924 | hisQ  | 2.22 | histidine transport system permease HisQ                                                                        |
| PA3045 | rocA2 | 3.56 | Two-component response regulator, RocA2                                                                         |
| PA3126 | ibpA  | 4.28 | heat-shock protein IbpA                                                                                         |
| PA3232 |       | 2.87 | probable nuclease                                                                                               |
| PA3337 | rfaD  | 3.99 | ADP-L-glycero-D-mannoheptose 6-epimerase                                                                        |
| PA3507 |       | 2.76 | probable short-chain dehydrogenase                                                                              |
| PA3521 | opmE  | 2.66 | probable outer membrane protein precursor<br>probable Resistance-Nodulation-Cell Division (RND) efflux membrane |
| PA3523 |       | 2.84 | fusion protein precursor                                                                                        |
| PA3544 | algE  | 3.03 | Alginate production outer membrane protein AlgE precursor                                                       |
| PA3630 |       | 2.70 | probable transcriptional regulator                                                                              |
| PA3676 | mexK  | 3.01 | MexK                                                                                                            |
| PA3677 | mexJ  | 2.41 | MexJ                                                                                                            |
| PA3709 |       | 2.49 | probable major facilitator superfamily (MFS) transporter                                                        |
| PA3713 | spdH  | 2.36 | spermidine dehydrogenase, SpdH                                                                                  |
| PA3761 | nagE  | 2.96 | N-Acetyl-D-Glucosamine phosphotransferase system transporter                                                    |
| PA3870 | moaA1 | 2.35 | molybdopterin biosynthetic protein A1                                                                           |
| PA3957 |       | 2.69 | probable short-chain dehydrogenase                                                                              |
| PA4078 |       | 2.12 | probable nonribosomal peptide synthetase                                                                        |
| PA4082 | cupB5 | 2.79 | adhesive protein CupB5                                                                                          |
| PA4096 | phIE  | 2.62 | probable major facilitator superfamily (MFS) transporter                                                        |
| PA4127 | hpcG  | 2.35 | 2-oxo-hept-3-ene-1,7-dioate hydratase                                                                           |
| PA4150 | acoA  | 3.09 | probable dehydrogenase E1 component<br>probable Resistance-Nodulation-Cell Division (RND) efflux membrane       |
| PA4206 | mexH  | 2.91 | fusion protein precursor                                                                                        |
| PA4224 | pchG  | 2.15 | pyochelin biosynthetic protein PchG                                                                             |
| PA4225 | pchF  | 2.18 | pyochelin synthetase                                                                                            |
| PA4303 | tadZ  | 2.72 | TadZ                                                                                                            |



|        |       |      |                                                                     |
|--------|-------|------|---------------------------------------------------------------------|
| PA4341 |       | 3.51 | probable transcriptional regulator                                  |
| PA4542 | clpB  | 2.85 | ClpB protein                                                        |
|        |       |      | Resistance-Nodulation-Cell Division (RND) multidrug efflux membrane |
| PA4599 | mexC  | 2.26 | fusion protein MexC precursor                                       |
| PA4759 | dapB  | 2.50 | dihydrodipicolinate reductase                                       |
| PA4760 | dnaJ  | 2.84 | DnaJ protein                                                        |
| PA4761 | dnaK  | 2.23 | DnaK protein                                                        |
| PA4762 | grpE  | 2.86 | heat shock protein GrpE                                             |
| PA4811 | fdnH  | 2.77 | nitrate-inducible formate dehydrogenase, beta subunit               |
| PA5048 |       | 2.54 | probable nuclease                                                   |
| PA5054 | hslU  | 3.11 | heat shock protein HslU                                             |
| PA5098 | hutH  | 2.21 | histidine ammonia-lyase                                             |
| PA5326 | sphD  | 2.16 | SphD                                                                |
| PA5353 | glcF  | 2.16 | glycolate oxidase subunit GlcF                                      |
| PA5354 | glcE  | 3.04 | glycolate oxidase subunit GlcE                                      |
| PA5375 | betT1 | 2.61 | BetT1                                                               |
| PA5418 | soxA  | 3.44 | sarcosine oxidase alpha subunit                                     |

### Hypothetical proteins

|        |      |      |                                           |
|--------|------|------|-------------------------------------------|
| PA0013 | yhhQ | 2.62 | conserved hypothetical protein            |
| PA0014 |      | 2.19 | hypothetical protein                      |
| PA0069 |      | 2.39 | conserved hypothetical protein            |
| PA0097 |      | 2.25 | hypothetical protein                      |
| PA0200 |      | 2.26 | hypothetical protein                      |
| PA0213 | mdcG | 2.21 | hypothetical protein                      |
| PA0442 |      | 3.43 | hypothetical protein                      |
| PA0498 |      | 3.84 | hypothetical protein                      |
| PA0698 |      | 2.86 | hypothetical protein                      |
| PA0714 |      | 2.88 | hypothetical protein                      |
| PA0717 |      | 3.44 | hypothetical protein of bacteriophage Pf1 |
| PA0990 |      | 2.66 | conserved hypothetical protein            |
| PA1168 |      | 2.64 | hypothetical protein                      |
| PA1231 |      | 2.87 | conserved hypothetical protein            |
| PA1259 |      | 2.84 | hypothetical protein                      |
| PA1360 | ybiF | 2.76 | conserved hypothetical protein            |
| PA1394 |      | 2.20 | hypothetical protein                      |
| PA1426 |      | 2.10 | hypothetical protein                      |
| PA1489 |      | 4.42 | hypothetical protein                      |
| PA1531 |      | 4.35 | hypothetical protein                      |
| PA1536 |      | 3.16 | conserved hypothetical protein            |
| PA1559 |      | 2.41 | hypothetical protein                      |
| PA1560 |      | 2.91 | hypothetical protein                      |
| PA1568 |      | 2.32 | conserved hypothetical protein            |
| PA1638 | yneH | 3.46 | conserved hypothetical protein            |
| PA1764 |      | 3.01 | hypothetical protein                      |

|        |      |      |                                |
|--------|------|------|--------------------------------|
| PA2002 | atoE | 3.22 | conserved hypothetical protein |
| PA2036 |      | 3.42 | hypothetical protein           |
| PA2038 |      | 2.82 | hypothetical protein           |
| PA2072 |      | 2.47 | conserved hypothetical protein |
| PA2144 | glgP | 2.98 | hypothetical protein           |
| PA2182 |      | 3.05 | hypothetical protein           |
| PA2357 | msuE | 3.15 | hypothetical protein           |
| PA2655 |      | 3.15 | hypothetical protein           |
| PA2753 |      | 3.24 | hypothetical protein           |
| PA2782 |      | 2.83 | hypothetical protein           |
| PA2792 |      | 2.95 | hypothetical protein           |
| PA2929 |      | 2.24 | hypothetical protein           |
| PA3402 |      | 2.94 | hypothetical protein           |
| PA3428 |      | 2.26 | hypothetical protein           |
| PA3905 |      | 2.86 | hypothetical protein           |
| PA3952 |      | 2.53 | hypothetical protein           |
| PA4106 |      | 2.55 | conserved hypothetical protein |
| PA4134 |      | 2.48 | hypothetical protein           |
| PA4139 |      | 3.48 | hypothetical protein           |
| PA4713 |      | 2.24 | hypothetical protein           |
| PA4779 |      | 2.10 | hypothetical protein           |
| PA4823 |      | 2.46 | hypothetical protein           |
| PA4962 | ybcI | 3.18 | conserved hypothetical protein |
| PA5136 |      | 2.33 | hypothetical protein           |
| PA5139 |      | 2.26 | hypothetical protein           |
| PA5475 |      | 2.99 | hypothetical protein           |
| PA5544 |      | 3.12 | conserved hypothetical protein |

**a.** Fold change represents the average change fold (log of base 2) of mRNA transcript levels in 5A-treated against untreated strains of *P. aeruginosa* PAO1.

**b.** Open reading frame (ORF) is as annotated in <http://www.pseudomonas.com/>.

**Table S2** ORFs downregulated by SSA ( $\geq 1.5$ )

| ORF <sup>b</sup>                 | Gene | fold <sup>a</sup> | Description                                              |
|----------------------------------|------|-------------------|----------------------------------------------------------|
| <b>Type III secretion system</b> |      |                   |                                                          |
| PA1713                           | exsA | 1.50              | transcriptional regulator ExsA                           |
| PA0044                           | exoT | 2.12              | exoenzyme T                                              |
| PA1705                           | pcrG | 2.41              | regulator in type III secretion                          |
| PA1706                           | pcrV | 2.00              | type III secretion protein PcrV                          |
| PA1707                           | pcrH | 2.04              | regulatory protein PcrH                                  |
| PA1709                           | popD | 1.88              | Translocator outer membrane protein PopD precursor       |
| PA1710                           | exsC | 1.68              | ExsC, exoenzyme S synthesis protein C precursor.         |
| PA1714                           | exsD | 1.66              | ExsD                                                     |
| PA1715                           | pscB | 1.95              | type III export apparatus protein                        |
| PA1716                           | pscC | 1.74              | Type III secretion outer membrane protein PscC precursor |
| PA1717                           | pscD | 1.93              | type III export protein PscD                             |
| PA1718                           | pscE | 1.97              | type III export protein PscE                             |
| PA1719                           | pscF | 1.76              | type III export protein PscF                             |
| PA1720                           | pscG | 2.03              | type III export protein PscG                             |
| PA1721                           | pscH | 1.83              | type III export protein PscH                             |
| PA1722                           | pscI | 1.80              | type III export protein PscI                             |
| PA1723                           | pscJ | 1.77              | type III export protein PscJ                             |
| PA1724                           | pscK | 1.52              | type III export protein PscK                             |
| PA1725                           | pscL | 1.70              | type III export protein PscL                             |
| PA2808                           | ptrA | 1.65              | Pseudomonas type III repressor A                         |
| PA3841                           | exoS | 1.86              | exoenzyme S                                              |
| <b>Other functions</b>           |      |                   |                                                          |
| PA0031                           | betC | 2.64              | choline sulfatase                                        |
| PA0058                           | dsbM | 1.71              | DsbM                                                     |
| PA0129                           | bauD | 1.57              | Amino acid permease                                      |
| PA0138                           |      | 2.74              | probable permease of ABC transporter                     |
| PA0164                           |      | 2.48              | probable gamma-glutamyltranspeptidase                    |
| PA0182                           | yjgl | 3.03              | probable short-chain dehydrogenase                       |
| PA0208                           | mdcA | 2.65              | malonate decarboxylase alpha subunit                     |
| PA0220                           |      | 2.39              | amino acid APC family transporter                        |
| PA0247                           | pobA | 2.03              | p-hydroxybenzoate hydroxylase                            |
| PA0352                           | yicE | 2.75              | probable transporter                                     |
| PA0364                           |      | 1.83              | probable oxidoreductase                                  |
| PA0450                           |      | 1.64              | probable phosphate transporter                           |
| PA0489                           |      | 1.80              | probable phosphoribosyl transferase                      |
| PA0508                           |      | 1.62              | probable acyl-CoA dehydrogenase                          |
| PA0513                           | nirG | 2.40              | NirG                                                     |
| PA0514                           | nirL | 1.54              | heme d1 biosynthesis protein NirL                        |
| PA0524                           | norB | 2.48              | nitric-oxide reductase subunit B                         |

|        |       |      |                                                                                |
|--------|-------|------|--------------------------------------------------------------------------------|
| PA0534 | pauB1 | 2.50 | FAD-dependent oxidoreductase                                                   |
| PA0641 |       | 1.89 | probable bacteriophage protein                                                 |
| PA0690 | pdtA  | 2.52 | PdtA                                                                           |
| PA0707 | toxR  | 1.72 | transcriptional regulator ToxR                                                 |
| PA0845 | cerN  | 2.91 | CerN                                                                           |
| PA0866 | aroP2 | 2.08 | aromatic amino acid transport protein AroP2                                    |
| PA0880 |       | 1.52 | probable ring-cleaving dioxygenase                                             |
| PA0884 | dctP  | 2.58 | probable C4-dicarboxylate-binding periplasmic protein                          |
| PA1003 | mvfR  | 1.55 | Transcriptional regulator MvfR                                                 |
| PA1127 | gsp69 | 2.30 | probable oxidoreductase                                                        |
| PA1141 |       | 2.50 | probable transcriptional regulator                                             |
| PA1326 | ilvA2 | 1.52 | threonine dehydratase, biosynthetic                                            |
| PA1384 | galE  | 2.28 | UDP-glucose 4-epimerase                                                        |
| PA1385 |       | 2.18 | probable glycosyl transferase                                                  |
| PA1519 |       | 1.61 | probable transporter                                                           |
| PA1537 |       | 2.09 | probable short-chain dehydrogenase                                             |
| PA1565 | pauB2 | 2.43 | FAD-dependent oxidoreductase                                                   |
| PA1566 | pauA3 | 2.06 | Glutamylpolyamine synthetase                                                   |
| PA1651 |       | 1.72 | probable transporter                                                           |
| PA1785 | nasT  | 1.95 | NasT                                                                           |
| PA1820 | nhaB  | 3.19 | sodium/proton antiporter NhaB                                                  |
| PA1869 |       | 1.97 | probable acyl carrier protein                                                  |
| PA1908 |       | 1.72 | probable major facilitator superfamily (MFS) transporter                       |
| PA1919 | nrdG  | 2.99 | class III (anaerobic) ribonucleoside-triphosphate reductase activating protein |
| PA1947 | rbsA  | 1.53 | ribose transport protein RbsA                                                  |
| PA1978 | erbR  | 1.96 | response regulator ErbR                                                        |
| PA1980 | eraR  | 1.59 | response regulator EraR                                                        |
| PA1983 | exaB  | 2.55 | cytochrome c550                                                                |
| PA2005 |       | 3.38 | probable transcriptional regulator                                             |
| PA2018 | mexY  | 1.59 | Resistance-Nodulation-Cell Division (RND) multidrug efflux transporter MexY    |
| PA2051 |       | 3.35 | probable transmembrane sensor                                                  |
| PA2073 |       | 1.74 | probable transporter (membrane subunit)                                        |
| PA2187 |       | 1.67 | probable alcohol dehydrogenase (Zn-dependent)                                  |
| PA2190 |       | 2.34 | adenylate cyclase ExoY                                                         |
| PA2201 |       | 1.56 | probable amino acid permease                                                   |
| PA2216 |       | 1.96 | probable aldehyde dehydrogenase                                                |
| PA2275 | yahK  | 1.53 | probable transcriptional regulator                                             |
| PA2278 | arsB  | 1.81 | ArsC protein                                                                   |
| PA2355 | msuC  | 2.60 | methanesulfonate sulfonate MsuD                                                |
| PA2385 | pvdQ  | 1.78 | L-ornithine N5-oxygenase                                                       |
| PA2388 | fpvR  | 1.88 | PvdR                                                                           |
| PA2391 | opmQ  | 1.54 | PvdP                                                                           |
| PA2392 | pvdP  | 2.23 | probable dipeptidase precursor                                                 |
| PA2394 | pvdN  | 1.81 | PvdO                                                                           |
| PA2396 | pvdF  | 1.99 | pyoverdine biosynthesis protein PvdE                                           |

|        |       |      |                                                                                         |
|--------|-------|------|-----------------------------------------------------------------------------------------|
| PA2413 | pvdH  | 1.93 | L-2,4-diaminobutyrate:2-ketoglutarate 4-aminotransferase, PvdH                          |
| PA2432 | bexR  | 1.54 | bistable expression regulator, BexR                                                     |
| PA2444 | glyA2 | 1.63 | serine hydroxymethyltransferase                                                         |
| PA2473 |       | 1.83 | probable glutathione S-transferase                                                      |
| PA2494 | mexF  | 3.19 | Resistance-Nodulation-Cell Division (RND) multidrug efflux transporter MexF             |
| PA2512 | antA  | 1.53 | anthranilate dioxygenase large subunit                                                  |
| PA2513 | antB  | 1.59 | anthranilate dioxygenase small subunit                                                  |
| PA2516 | xylZ  | 2.06 | toluate 1,2-dioxygenase electron transfer component                                     |
| PA2520 | czcA  | 1.61 | Resistance-Nodulation-Cell Division (RND) divalent metal cation efflux transporter CzcA |
| PA2522 | czcC  | 1.66 | outer membrane protein precursor CzcC                                                   |
| PA2547 |       | 3.41 | probable transcriptional regulator                                                      |
| PA2601 |       | 1.63 | probable transcriptional regulator                                                      |
| PA2838 |       | 3.89 | probable transcriptional regulator                                                      |
| PA2917 |       | 2.23 | probable transcriptional regulator                                                      |
| PA3053 |       | 3.24 | probable hydrolytic enzyme                                                              |
| PA3095 | xcpZ  | 2.10 | general secretion pathway protein M                                                     |
| PA3122 | yibL  | 1.92 | probable transcriptional regulator                                                      |
| PA3175 |       | 1.69 | probable arginase family protein                                                        |
| PA3188 | gltG  | 3.06 | probable permease of ABC sugar transporter                                              |
| PA3279 | oprP  | 1.85 | Phosphate-specific outer membrane porin OprP precursor                                  |
| PA3319 | plcN  | 2.45 | non-hemolytic phospholipase C precursor                                                 |
| PA3395 | nosY  | 1.98 | NosY protein                                                                            |
| PA3467 |       | 2.45 | probable major facilitator superfamily (MFS) transporter                                |
| PA3541 | alg8  | 2.07 | alginate biosynthesis protein Alg8                                                      |
| PA3548 | algI  | 3.39 | alginate o-acetyltransferase AlgI                                                       |
| PA3609 | potC  | 2.89 | polyamine transport protein PotC                                                        |
| PA3776 |       | 3.93 | probable transcriptional regulator                                                      |
| PA3842 | spcS  | 2.17 | specific Pseudomonas chaperone for ExoS, SpcS                                           |
| PA3909 | eddB  | 2.48 | Extracellular DNA degradation protein, EddB                                             |
| PA4083 | cupB4 | 2.80 | chaperone CupB4                                                                         |
| PA4091 | hpaA  | 2.09 | 4-hydroxyphenylacetate 3-monooxygenase large chain                                      |
| PA4092 | hpaC  | 2.02 | 4-hydroxyphenylacetate 3-monooxygenase small chain                                      |
| PA4130 |       | 1.84 | probable sulfite or nitrite reductase                                                   |
|        | cyaB; |      |                                                                                         |
| PA4143 | cvaB  | 2.04 | probable toxin transporter                                                              |
| PA4306 | flp   | 2.76 | Type IVb pilin, Flp                                                                     |
| PA4330 |       | 1.50 | probable enoyl-CoA hydratase/isomerase                                                  |
| PA4343 |       | 1.80 | probable major facilitator superfamily (MFS) transporter                                |
| PA4363 | iciA  | 1.69 | inhibitor of chromosome initiation IciA                                                 |
| PA4827 | nat   | 3.81 | arylamine N-acetyltransferase                                                           |
| PA4859 |       | 1.50 | probable permease of ABC transporter                                                    |
| PA4860 |       | 3.08 | probable permease of ABC transporter                                                    |
| PA4867 | ureB  | 2.77 | urease beta subunit                                                                     |
| PA4888 | desB  | 1.58 | acyl-CoA delta-9-desaturase, DesB                                                       |
| PA4891 | ureE  | 1.76 | urease accessory protein UreE                                                           |

|        |      |      |                                                          |
|--------|------|------|----------------------------------------------------------|
| PA4898 | opdK | 3.13 | histidine porin OpdK                                     |
| PA4899 |      | 2.10 | probable aldehyde dehydrogenase                          |
| PA4979 |      | 2.40 | probable acyl-CoA dehydrogenase                          |
| PA4986 |      | 2.56 | probable oxidoreductase                                  |
| PA4990 |      | 4.01 | SMR multidrug efflux transporter                         |
| PA5075 |      | 2.25 | probable permease of ABC transporter                     |
| PA5097 | hutT | 2.31 | probable amino acid permease                             |
| PA5150 |      | 1.69 | probable short-chain dehydrogenase                       |
| PA5293 |      | 1.63 | probable transcriptional regulator                       |
| PA5311 |      | 1.50 | probable major facilitator superfamily (MFS) transporter |
| PA5328 | sphB | 2.10 | SphB                                                     |
| PA5398 | dgcA | 1.79 | DgcA, Dimethylglycine catabolism                         |
| PA5417 | soxD | 2.94 | sarcosine oxidase delta subunit                          |
| PA5479 | gltP | 3.03 | proton-glutamate symporter                               |

### Hypothetical proteins

|        |      |      |                                |
|--------|------|------|--------------------------------|
| PA0022 | yrdC | 2.74 | conserved hypothetical protein |
| PA0234 |      | 1.59 | hypothetical protein           |
| PA0278 |      | 1.70 | hypothetical protein           |
| PA0311 |      | 1.97 | hypothetical protein           |
| PA0327 |      | 1.78 | hypothetical protein           |
| PA0496 | ybgK | 2.60 | conserved hypothetical protein |
| PA0540 |      | 2.39 | hypothetical protein           |
| PA0695 |      | 2.16 | hypothetical protein           |
| PA0696 |      | 2.03 | hypothetical protein           |
| PA0702 |      | 1.74 | hypothetical protein           |
| PA0735 |      | 2.32 | hypothetical protein           |
| PA0775 | yecO | 1.66 | conserved hypothetical protein |
| PA0824 |      | 2.51 | hypothetical protein           |
| PA0834 |      | 1.61 | conserved hypothetical protein |
| PA0915 | yehS | 2.76 | conserved hypothetical protein |
| PA0981 |      | 2.95 | hypothetical protein           |
| PA1126 |      | 1.61 | hypothetical protein           |
| PA1134 |      | 1.54 | hypothetical protein           |
| PA1190 | yohC | 1.78 | conserved hypothetical protein |
| PA1200 |      | 1.71 | conserved hypothetical protein |
| PA1211 |      | 3.45 | hypothetical protein           |
| PA1214 |      | 1.66 | hypothetical protein           |
| PA1346 |      | 2.15 | hypothetical protein           |
| PA1433 |      | 2.41 | conserved hypothetical protein |
| PA1499 |      | 2.02 | conserved hypothetical protein |
| PA1503 |      | 1.84 | hypothetical protein           |
| PA1841 |      | 1.58 | hypothetical protein           |
| PA1878 |      | 1.68 | hypothetical protein           |
| PA1891 |      | 1.68 | hypothetical protein           |

|        |      |      |                                |
|--------|------|------|--------------------------------|
| PA1893 |      | 1.96 | hypothetical protein           |
| PA1917 |      | 2.03 | hypothetical protein           |
| PA1929 |      | 1.73 | hypothetical protein           |
| PA2043 |      | 3.06 | hypothetical protein           |
| PA2122 |      | 1.73 | hypothetical protein           |
| PA2206 |      | 3.27 | hypothetical protein           |
| PA2210 |      | 1.53 | conserved hypothetical protein |
| PA2376 |      | 2.28 | hypothetical protein           |
| PA2421 |      | 2.06 | hypothetical protein           |
| PA2427 |      | 2.17 | hypothetical protein           |
| PA2448 |      | 2.00 | hypothetical protein           |
| PA2490 | ydbB | 2.11 | conserved hypothetical protein |
| PA2498 | yahD | 1.58 | conserved hypothetical protein |
| PA2566 |      | 2.80 | conserved hypothetical protein |
| PA2602 |      | 2.59 | hypothetical protein           |
| PA2628 |      | 1.53 | hypothetical protein           |
| PA2752 | yqaA | 2.03 | conserved hypothetical protein |
| PA2916 |      | 2.01 | hypothetical protein           |
| PA3281 |      | 1.56 | hypothetical protein           |
| PA3283 |      | 1.93 | conserved hypothetical protein |
| PA3284 |      | 2.23 | hypothetical protein           |
| PA3320 |      | 3.22 | hypothetical protein           |
| PA3380 | phnG | 1.53 | conserved hypothetical protein |
| PA3425 |      | 1.85 | hypothetical protein           |
| PA3470 |      | 1.55 | hypothetical protein           |
| PA3518 |      | 2.21 | hypothetical protein           |
| PA3519 |      | 1.53 | hypothetical protein           |
| PA3843 |      | 2.37 | hypothetical protein           |
| PA3991 |      | 2.64 | hypothetical protein           |
| PA4287 |      | 1.62 | hypothetical protein           |
| PA4582 |      | 2.02 | conserved hypothetical protein |
| PA4583 | rtcB | 2.72 | conserved hypothetical protein |
| PA4584 | ycgL | 1.76 | conserved hypothetical protein |
| PA4794 |      | 1.95 | hypothetical protein           |
| PA4818 |      | 1.57 | conserved hypothetical protein |
| PA4882 |      | 1.82 | hypothetical protein           |
| PA4985 |      | 3.95 | hypothetical protein           |
| PA5194 |      | 2.08 | hypothetical protein           |
| PA5480 |      | 2.64 | hypothetical protein           |
| PA5509 |      | 1.65 | hypothetical protein           |

a. Fold change represents the average change fold (log of base 2) of mRNA transcript levels in 5A-treated against untreated strains of *P. aeruginosa* PAO1.

b. Open reading frame (ORF) is as annotated in <http://www.pseudomonas.com/>.

**Table S3. Strains and plasmids used in this study\***

| <b>Strain or plasmid</b> | <b>Description</b>                                                                                                                                                                                                               | <b>Source or reference</b> |
|--------------------------|----------------------------------------------------------------------------------------------------------------------------------------------------------------------------------------------------------------------------------|----------------------------|
| <i>E. coli</i>           |                                                                                                                                                                                                                                  |                            |
| DH5 $\alpha$             | F <sup>-</sup> f80 <i>dlacZDM15 endA1hsdR17</i> ( $r_k^- m_k^-$ ) <i>supE44 thi-1 gyrA96</i> D( <i>lacZYA-argF</i> ), used for plasmid transformation                                                                            | Gibco                      |
| S17-1                    | <i>res^- pro mod^+</i> integrated copy of RP4, <i>mob^+</i> , used for incorporating constructs into <i>P. aeruginosa</i>                                                                                                        | Laboratory collection      |
| <b>Plasmids</b>          |                                                                                                                                                                                                                                  |                            |
| Tn7T-Gm-lacZ             | mini-Tn7T cloning and delivery vector for <i>lacZ</i> transcriptional fusion vector, Gm <sup>r</sup>                                                                                                                             | (1)                        |
| pFLP2                    | Source of Flp recombinase; Cb <sup>r</sup>                                                                                                                                                                                       | (1)                        |
| Tn7-pqsA                 | mini-Tn7T-Gm-lacZ carrying the promoter region of <i>pqsA</i> for reporting the <i>pqsA</i> transcription                                                                                                                        | (2)                        |
| pME6016                  | shuttle vector for transcriptional <i>lacZ</i> fusion in <i>P.aeruginosa</i> , Tc <sup>r</sup>                                                                                                                                   | (3)                        |
| pME-RhII                 | pME6016 carrying the promoter region of <i>rhII</i> for reporting the <i>rhII</i> transcription, Tc <sup>r</sup>                                                                                                                 | (2)                        |
| pME-lasB                 | pME6016 carrying the promoter region of <i>lasB</i> for reporting the <i>lasB</i> transcription, Tc <sup>r</sup>                                                                                                                 | (2)                        |
| pEX18Gm                  | Suicide plasmid carrying <i>sacBR</i> , Gm <sup>r</sup>                                                                                                                                                                          | (4)                        |
| pEX18G-vfr               | pEX18Gm containing the <i>vfr</i> flanking region with part of <i>vfr</i> being deleted in frame, Gm <sup>r</sup>                                                                                                                | This study                 |
| pEX18G-spuB              | pEX18Gm containing the <i>spuB</i> flanking region with part of <i>spuB</i> being deleted in frame, Gm <sup>r</sup>                                                                                                              | This study                 |
| pEX18G-spuE              | pEX18Gm containing the <i>spuE</i> flanking region with part of <i>spuE</i> being deleted in frame, Gm <sup>r</sup>                                                                                                              | This study                 |
| <i>P. aeruginosa</i>     |                                                                                                                                                                                                                                  |                            |
| PAO1                     | Prototrophic laboratory strain                                                                                                                                                                                                   | Laboratory collection      |
| PCZ                      | PAO1 carrying promoterless <i>lacZ</i> fused to the <i>exsCEBA</i> promoter and integrated at the <i>attB</i> site of the PAO1 chromosome, Tc <sup>r</sup>                                                                       | (5)                        |
| PAO1( $\Delta$ exsA)     | PAO1 with inactivation of <i>exsA</i> , Gm <sup>r</sup>                                                                                                                                                                          | (5)                        |
| PCZ ( $\Delta$ vfr)      | PCZ with inframe deletion of <i>vfr</i> , Tc <sup>r</sup>                                                                                                                                                                        | This study                 |
| PCZ ( $\Delta$ spuB)     | PCZ with inframe deletion of <i>spuB</i> , Tc <sup>r</sup>                                                                                                                                                                       | This study                 |
| PCZ ( $\Delta$ spuE)     | PCZ with inframe deletion of <i>spuE</i> , Tc <sup>r</sup>                                                                                                                                                                       | This study                 |
| PAO1(pME-rhII)           | PAO1 carrying the pME-rhII plasmid for reporting the <i>rhII</i> transcription, Tc <sup>r</sup>                                                                                                                                  | (2)                        |
| PAO1(pME-lasB)           | PAO1 carrying the pME-lasB plasmid for reporting the <i>lasB</i> transcription, Tc <sup>r</sup>                                                                                                                                  | (2)                        |
| PAO1(T7T-pqsA)           | PAO1 chromosomally integrated at its <i>att</i> site with a fragment in which the promoter region of <i>pqsA</i> was transcriptionally fused with the promoterless <i>lacZ</i> gene for reporting the <i>pqsA</i> transcription. | (2)                        |

\* Symbol: Gm<sup>r</sup>, gentamicin resistant; Cb<sup>r</sup>, carbenicillin resistant; Tc<sup>r</sup>, tetracycline resistant.



## Reference

1. **Choi KH, Schweizer HP.** 2006. mini-Tn7 insertion in bacteria with secondary, non-glmS-linked attTn7 sites: example *Proteus mirabilis* HI4320. *Nat Protoc* **1**:170-178.
2. **Lee J, Wu J, Deng Y, Wang J, Wang C, Chang C, Dong Y, Williams P, Zhang LH.** 2013. A cell-cell communication signal integrates quorum sensing and stress response. *Nature chemical biology* **9**:339-343.
3. **Schnider-Keel U, Seematter A, Maurhofer M, Blumer C, Duffy B, Gigot-Bonnefoy C, Reimann C, Notz R, Defago G, Haas D, Keel C.** 2000. Autoinduction of 2,4-diacetylphloroglucinol biosynthesis in the biocontrol agent *Pseudomonas fluorescens* CHA0 and repression by the bacterial metabolites salicylate and pyoluteorin. *J Bacteriol* **182**:1215-1225.
4. **Hoang TT, Karkhoff-Schweizer RR, Kutchma AJ, Schweizer HP.** 1998. A broad-host-range Flp-FRT recombination system for site-specific excision of chromosomally-located DNA sequences: application for isolation of unmarked *Pseudomonas aeruginosa* mutants. *Gene* **212**:77-86.
5. **Zhou L, Wang J, Zhang LH.** 2007. Modulation of bacterial Type III secretion system by a spermidine transporter dependent signaling pathway. *PLoS One* **2**:e1291.

## Supplementary method

### General synthetic procedure

Chemicals commercially available were purchased from Sigma. Conjugation of Rhodamines or other reagents with polyamines was catalysed by 1,1-carbonyldiimidazole unless otherwise stated, purified by HPLC and verified by MS or NMR analyses. Synthesis of R101SPM in detail: Rhodamine 101 500 mg was dissolved in DMF 150 ml and a solution of 1,1-carbonyldiimidazole 210 mg in DMF 50 ml was added with stirring at room temperature for 30 min., the mixture was added with a solution of spermine 880 mg in DMF 5 ml and continued stirring at room temperature for 2 hours, the solvent DMF was then evaporated and the crude product was acidized with 1M HCl solution, and then subjected to HPLC on SymmetryPrep™ C18 reverse-phase column (7  $\mu$ m, 7.8 x 150mm, Waters), eluted with acetonitrile-water (gradient 20%-40%) at a flow of 4 ml/min. For the synthesis of R101SPD1 or R101SPD2, two types of Boc-protected spermidines were chosen as polyamines. The deprotected condition was TFA in CH<sub>2</sub>Cl<sub>2</sub> at room temperature for 2 hr.

**RhBSPM:** ESI (M<sup>+</sup>): 627.5/627.4 (Det./Cal.).

**BenzoylbenzeneSPM:** ESI (M+H<sup>+</sup>): 412.3/411.3 (Det./Cal.).

**AcidblueSPM:** ESI (M<sup>+</sup>): 852.5/852.4 (Det./Cal.).

**R110SPM:** H<sup>1</sup>-NMR (D<sub>2</sub>O):  $\delta$  7.85 (2H), 7.77 (1H), 7.34 (2H), 7.14 (3H), 7.04 (2H), 3.28 (2H), 2.74 (10H), 1.91 (4H), 1.71 (4H).

**FluorenoneSPM:** H<sup>1</sup>-NMR (D<sub>6</sub>-MeOD):  $\delta$  7.82 (m, 1H), 7.73 (m, 1H), 7.63 (m, 3H), 7.50 (m, 1H), 7.39 (m, 1H), 3.58 (t, 2H), 3.20 (m, 10H), 1.06 (m, 4H), 1.86 (m, 4H). C<sup>13</sup>-NMR:  $\delta$  194.9, 170.8, 146.8, 145.1, 137.1, 136.7, 135.4, 134.7, 131.5, 131.1, 129.9, 125.6, 123.8, 122.2, 48.5, 48.4, 46.4, 46.0, 37.9, 37.3, 27.8, 25.5, 24.5, 24.4.

**BiotinSPM:** ESI (M+H<sup>+</sup>): 429.3/428.3 (Det./Cal.); H<sup>1</sup>-NMR (D<sub>4</sub>-MeOD): δ 4.35 (m, 1H), 4.15 (m, 1H), 2.90 (m, 16H), 1.62 (m, 15H); C<sup>13</sup>-NMR: δ 177.4, 166.2, 63.6, 61.8, 57.3, 48.4, 48.3, 46.5, 46.0, 41.2, 38.0, 37.0, 36.6, 30.0, 29.7, 27.8, 26.8, 25.5, 24.42, 24.40.

**CinnamincSPM:** ESI (M+H<sup>+</sup>): 393.2/392.3 (Det./Cal.); H<sup>1</sup>-NMR (D<sub>4</sub>-MeOD): δ 7.51 (d, J = 12 Hz, 1H) , 7.16 (m, 2H), 7.13 (d, 1H), 6.50 (d, J = 12 Hz, 1H), 3.87 (s, 6H), 3.44 (t, 2H), 3.10 (m, 10H), 2.09 (m, 2H), 1.95 (m, 6H); C<sup>13</sup>-NMR: δ 168, 151, 149, 141, 128, 122, 117, 111, 110, 55, 47, 46, 45, 44, 36, 35, 27, 24, 23.

**AcridineSPM:** ESI (M+H<sup>+</sup>): 444.2/443.2 (Det./Cal.); H<sup>1</sup>-NMR (D<sub>4</sub>-MeOD): δ 8.39 (d, J = 8Hz, 1H), 7.76 (s, 1H), 7.73 (s, 1H), 7.69 (d, J = 12 Hz, 1H), 7.59, (m, 1H), 7.40 (m, 1H), 3.91 (s, 3H), 3.10 (m, 10H), 2.30 (m, 2H), 1.98 (m, 2H), 1.70 (m, 4H); C<sup>13</sup>-NMR: δ 163.4, 163.0, 158.6, 158.3, 142.1, 129.5, 129.1, 125.4, 121.7, 118.8, 116.0, 111.6, 104.0, 56.8, 48.34, 48.32, 47.4, 46.4, 45.9, 27.5, 25.5, 24.35, 24.31.

**R101SPM :** ESI (M<sup>+</sup>): 675.5/675.4 (Det./Cal.); H<sup>1</sup>-NMR (D<sub>4</sub>-MeOD): δ 7.88 (m, 1H), 7.75 (m, 2H), 7.37 (m, 1H), 6.74 (s, 2H), 3.53 (m, 8H), 3.19 (t, 2H), 3.07 (m, 10H), 2.85 (m, 4H), 2.70 (t, 4H), 2.09 (m, 6H), 1.95 (m, 4H), 1.75 (m, 6H); C<sup>13</sup>-NMR: δ 170.9, 156.8, 153.6, 152.6, 137.5, 133.7, 132.2, 132.1, 131.3, 129.2, 127.6, 125.3, 114.2, 106.7, 52.0, 51.5, 48.3, 48.2, 46.5, 46.0, 37.9, 37.6, 28.7, 27.6, 25.5, 24.4, 22.0, 21.1, 21.0.

**R101SPD1 :** ESI (M<sup>+</sup>): 618.5/618.4 (Det./Cal.); H<sup>1</sup>-NMR (D<sub>6</sub>-DMSO): δ 7.73 (m, 1H), 7.47 (m, 2H), 6.95 (m, 1H), 6.00 (s, 2H), 3.06 (m, 8H), 2.78 (m, 12H), 2.46 (m, 4H), 1.93 (m, 4H), 1.76 (m, 4H), 1.50 (m, 6H) ;C<sup>13</sup>-NMR: δ 169.2, 155.2, 148.9, 144.8, 134.2, 131.0, 129.5, 125.0, 124.9, 124.5, 123.6, 118.4, 108.4, 106.0, 50.4, 49.9, 47.4, 46.0, 39.5, 38.4, 27.9, 25.9, 25.4, 23.9, 22.7, 22.1, 22.0.

**R101SPD2:** ESI ( $M^+$ ): 618.5/618.4 (Det./Cal.);  $H^1$ -NMR ( $D_2O$ ): 7.73 (m, 3H), 7.15 (d, 1H), 6.75 (s, 2H), 3.45 (m, 8H), 3.00 (m, 10H), 2.67 (m, 6H), 1.96 (m, 10H), 1.46 (m, 2H), 1.22 (m, 2H);  $C^{13}$ -NMR:  $\delta$  171.0, 152.0, 151.0, 149.0, 136.0, 130.9, 130.7, 130.2, 130.1, 127.5, 126.0, 124.0, 112.0, 105.0, 50.5, 50.1, 47.2, 44.3, 38.6, 36.5, 27.0, 25.4, 23.7, 22.7, 20.2, 19.5, 19.2.

**R101PYA:** ESI ( $M^+$ ): 673.5/673.4 (Det./Cal.);  $H^1$ -NMR ( $D_4$ -MeOD):  $\delta$  7.90 (m, 1H), 7.75 (m, 2H), 7.37 (m, 1H), 6.73 (s, 2H), 3.53 (m, 8H), 3.04 (m, 24H), 1.97 (m, 12H);  $C^{13}$ -NMR:  $\delta$  169.0, 155.5, 152.0, 151.0, 135.8, 132.1, 130.9, 130.7, 129.7, 127.5, 126.0, 123.8, 113.7, 105.0, 54.0, 51.0, 50.5, 49.9, 49.5, 37.5, 36.2, 33.8, 27.2, 26.2, 25.2, 20.5, 19.5, 19.4.

**R101BPA:** ESI ( $M^+$ ): 604.5/604.4 (Det./Cal.);  $H^1$ -NMR ( $D_4$ -MeOD):  $\delta$  7.87 (m, 1H), 7.74 (m, 2H), 7.37 (m, 1H), 6.74 (s, 2H), 3.53 (m, 8H), 3.19 (t, 2H), 3.07 (m, 4H), 2.96 (m, 4H), 2.85 (t, 2H), 2.70 (t, 4H), 2.10 (m, 4H), 1.96 (m, 6H), 1.79 (m, 2H);  $C^{13}$ -NMR:  $\delta$  170.9, 156.7, 153.6, 152.6, 137.6, 133.7, 132.2, 132.1, 131.2, 129.2, 127.6, 125.4, 114.2, 106.5, 52.0, 51.5, 46.7, 46.0, 37.9, 37.6, 28.7, 27.6, 25.5, 22.0, 21.1, 21.0.

**R101PUT:** ESI ( $M^+$ ): 561.5/561.3 (Det./Cal.);  $H^1$ -NMR ( $D_4$ -MeOD):  $\delta$  7.84 (m, 1H), 7.74 (m, 2H), 7.37 (m, 1H), 6.74 (s, 2H), 3.55 (m, 8H), 3.08 (m, 6H), 2.83 (m, 2H), 2.70 (m, 4H), 2.10 (m, 4H), 1.95 (m, 4H), 1.50 (m, 4H);  $C^{13}$ -NMR:  $\delta$  173.0, 161.3, 152.1, 151.0, 136.5, 132.2, 130.7, 129.7, 127.6, 126.4, 124.1, 123.9, 112.9, 105.2, 50.5, 50.0, 38.9, 38.4, 27.4, 26.1, 24.5, 20.5, 19.7, 19.5.

**R101PRA:** ESI ( $M^+$ ): 547.5/547.3 (Det./Cal.);  $H^1$ -NMR ( $D_4$ -MeOD):  $\delta$  7.86 (m, 1H), 7.50 (m, 2H), 7.38 (m, 1H), 6.74 (s, 2H), 3.53 (m, 8H), 3.18 (t, 2H), 3.07 (t, 4H), 2.72 (m, 6H), 2.10 (m, 4H), 1.95 (m, 4H), 1.72 (m, 2H);  $C^{13}$ -NMR:  $\delta$  170.9, 156.8, 153.7, 152.6, 137.6, 133.8, 132.2, 132.1, 131.3, 129.1, 127.6, 125.3, 114.5, 106.8, 52.0, 51.5, 38.0, 37.5, 28.9, 28.7, 22.0, 21.0, 20.9.
